# Supplementary material for: Phenalenyl based neutral radical as a novel electrochromic material modulating visible to short-wave infrared light
Source: Royal Society of Chemistry journal article supplement (doi:10.1039/c8ra09804b), 2018-01-01
Supplement: c8ra09804b1.pdf [file c8ra09804b1.pdf]

## Supporting Information

### **Phenalenyl Based Neutral Radical as a Novel Electrochromic Material Modulating Visible to Short-Wave Infrared Light**

Dejan Stekovic<sup>\*a,b</sup> , Prof. Mikhail E. Itkis<sup>\*a,b,c</sup>

<sup>a</sup> Department of Chemistry, University of California, Riverside, California 92521, United States

<sup>b</sup> Center for Nanoscale Science and Engineering, University of California, Riverside, California 92521, United States

<sup>c</sup> Department of Chemical and Environmental Engineering, University of California, Riverside, California 92521, United States

\* E-mail: dstek001@ucr.edu , mitkis@engr.ucr.edu

## Table of Contents

|                                                            |   |
|------------------------------------------------------------|---|
| <b>Experimental</b> .....                                  | 3 |
| <b>Fig. S1:</b> Spectra of ITO Device Components .....     | 4 |
| <b>Fig. S2:</b> Spectra of Mt-SWNT Device Components ..... | 5 |
| <b>Fig. S3:</b> Picture of Mt-SWNT Device .....            | 6 |
| <b>References</b> .....                                    | 7 |

## ***Experimental Section***

*Materials:* Propylene Carbonate and hydroquinone were used as received (Sigma Aldrich).

*Synthesis of [PLY(O,NBu)]<sub>2</sub>B:* [PLY(O,NBu)]<sub>2</sub>B was synthesized as the cationic salt ([PLY(O,NBu)]<sub>2</sub>B<sup>+</sup> · BPh<sub>4</sub><sup>-</sup>) according to the literature.<sup>1</sup>

*Preparation of Electrochromic solution:* 8 mg of [PLY(O,NBu)]<sub>2</sub>B<sup>+</sup> · BPh<sub>4</sub><sup>-</sup> (9.0 x 10<sup>-6</sup> mol) along with 2 mg hydroquinone (1.8 x 10<sup>-5</sup> mol) was dissolved in 1 mL of propylene carbonate.

*ITO Sandwich Device preparation:* The electrochromic solution is sandwiched between two ITO coated glass slides (20 Ohm/sq, Thin Film Devices, Inc, Anaheim, CA) and sealed utilizing double sided tape with 3.5 mm x 13 mm rectangle cut aperture as shown in Figure 2a.

*MT-SWNT Sandwich Device preparation:* Similar to our previous report,<sup>2</sup> the thin MT-SWNT films (30 nm thick) were made utilizing vacuum filtration of the dispersion of large diameter (1.2-1.7 nm) 99% separated (IsoNantube-M) metallic SWNTs purchased from Nanointegris Inc. The films were transferred onto glass substrates bridging a 2 mm gap between predeposited Ti(15nm)/Pt(150 nm) electrodes. On one substrate, an adhesive seal frame (0.25 mm thick) (Frame-Seal™, Bio-Rad Laboratories) is placed. The cell is filled with electrochromic solution and another matching MT-SWNT on glass substrate is placed overtop (see picture in Figure S4).

*Spectroscopy/Electrochromic Measurements:* Transmittance spectra were recorded on a Carry 5000 UV-Vis Spectrophotometer (Agilent Technology). The potential was applied using a model DS345 synthesized function generator (Stanford Research Systems).

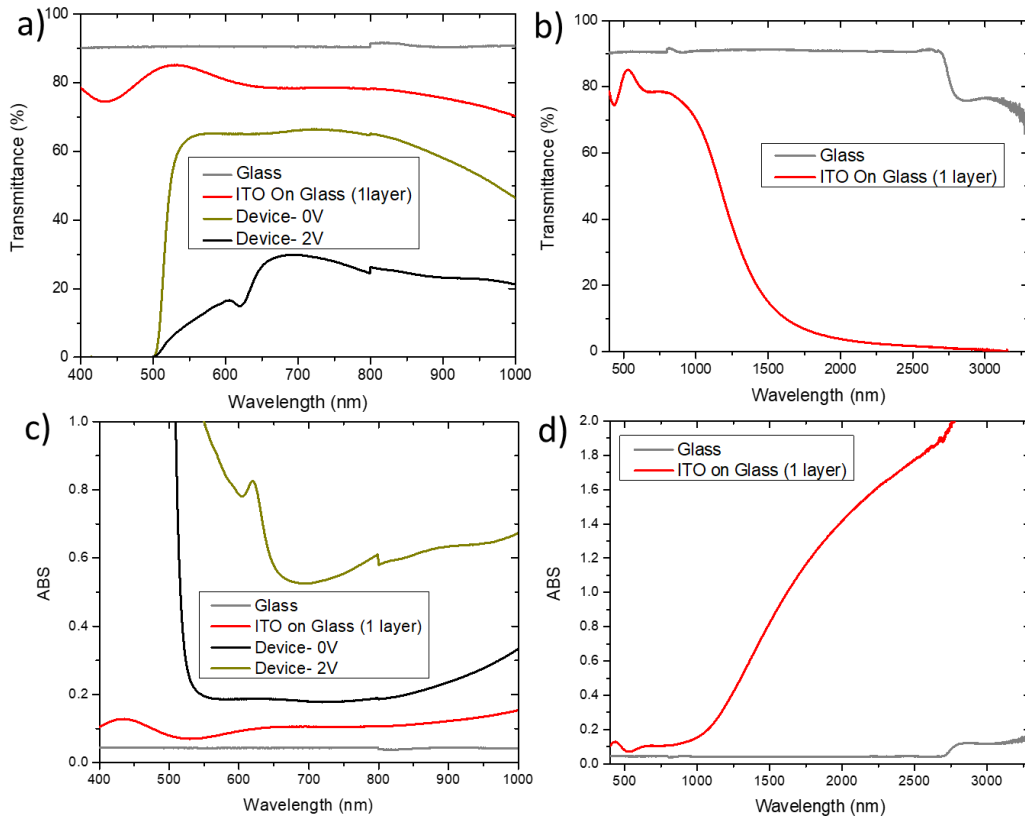

**Fig. S1:** (a) Transmittance and (c) absorbance spectra of device, glass and ITO on glass in the range of interest (400-1000 nm). (b) Transmittance and (d) absorbance spectra of glass and ITO on glass showing a high absorption of ITO above 1200 nm.

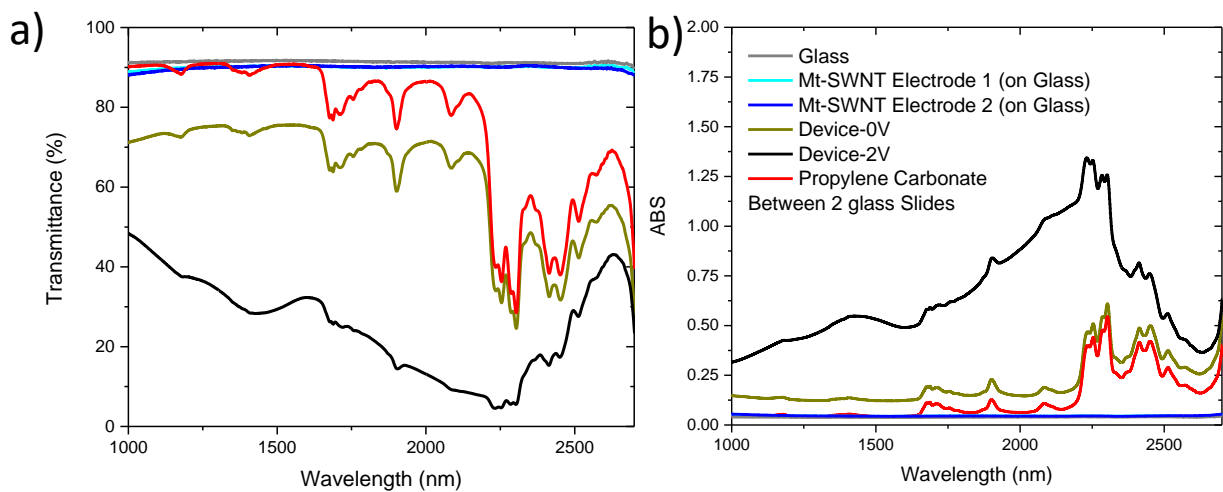

**Fig. S2:** (a) Transmittance and (b) absorbance spectra of  $[\text{PLY}(\text{O},\text{NBu})]_2\text{B}$  based device components using MT-SWNTs as electrodes. The MT-SWNTs absorb very little SWIR light while propylene carbonate absorbs a significant amount.

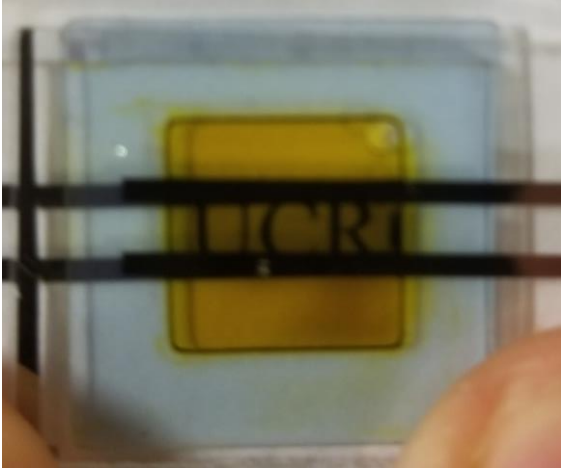

0V

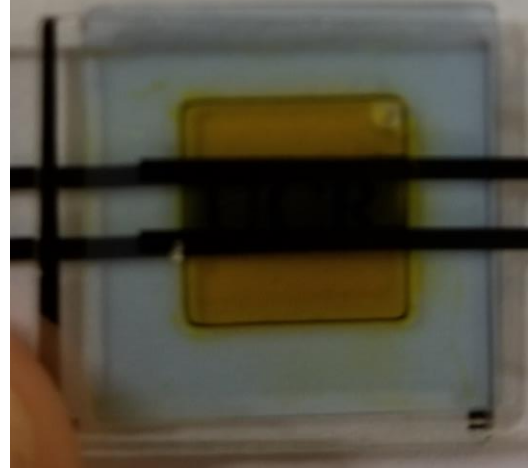

2V

**Fig. S3:** Pictures of the MT-SWNT electrode devices in their (left) transmissive and (right) black states.

## References:

1. X. Chi, M. E. Itkis, K. Kirschbaum, A. A. Pinkerton, R. T. Oakley, A. W. Cordes and R. C. Haddon, *J. Am. Chem. Soc.*, 2001, **123**, 4041-4048.
2. D. Stekovic, B. Arkook, G. Li, W. Li, E. Bekyarova and M. E. Itkis, *Adv. Mater. Interfaces*, 2018, 1800861.
